# Supplementary material for: Activated STING in the thymic epithelium alters T cell development and selection leading to autoimmunity
Source: JCI journal article supplement (doi:10.1172/jci180252), 2025-06-26
Supplement: sd2 [file 2]

# Supplementary Figure 1

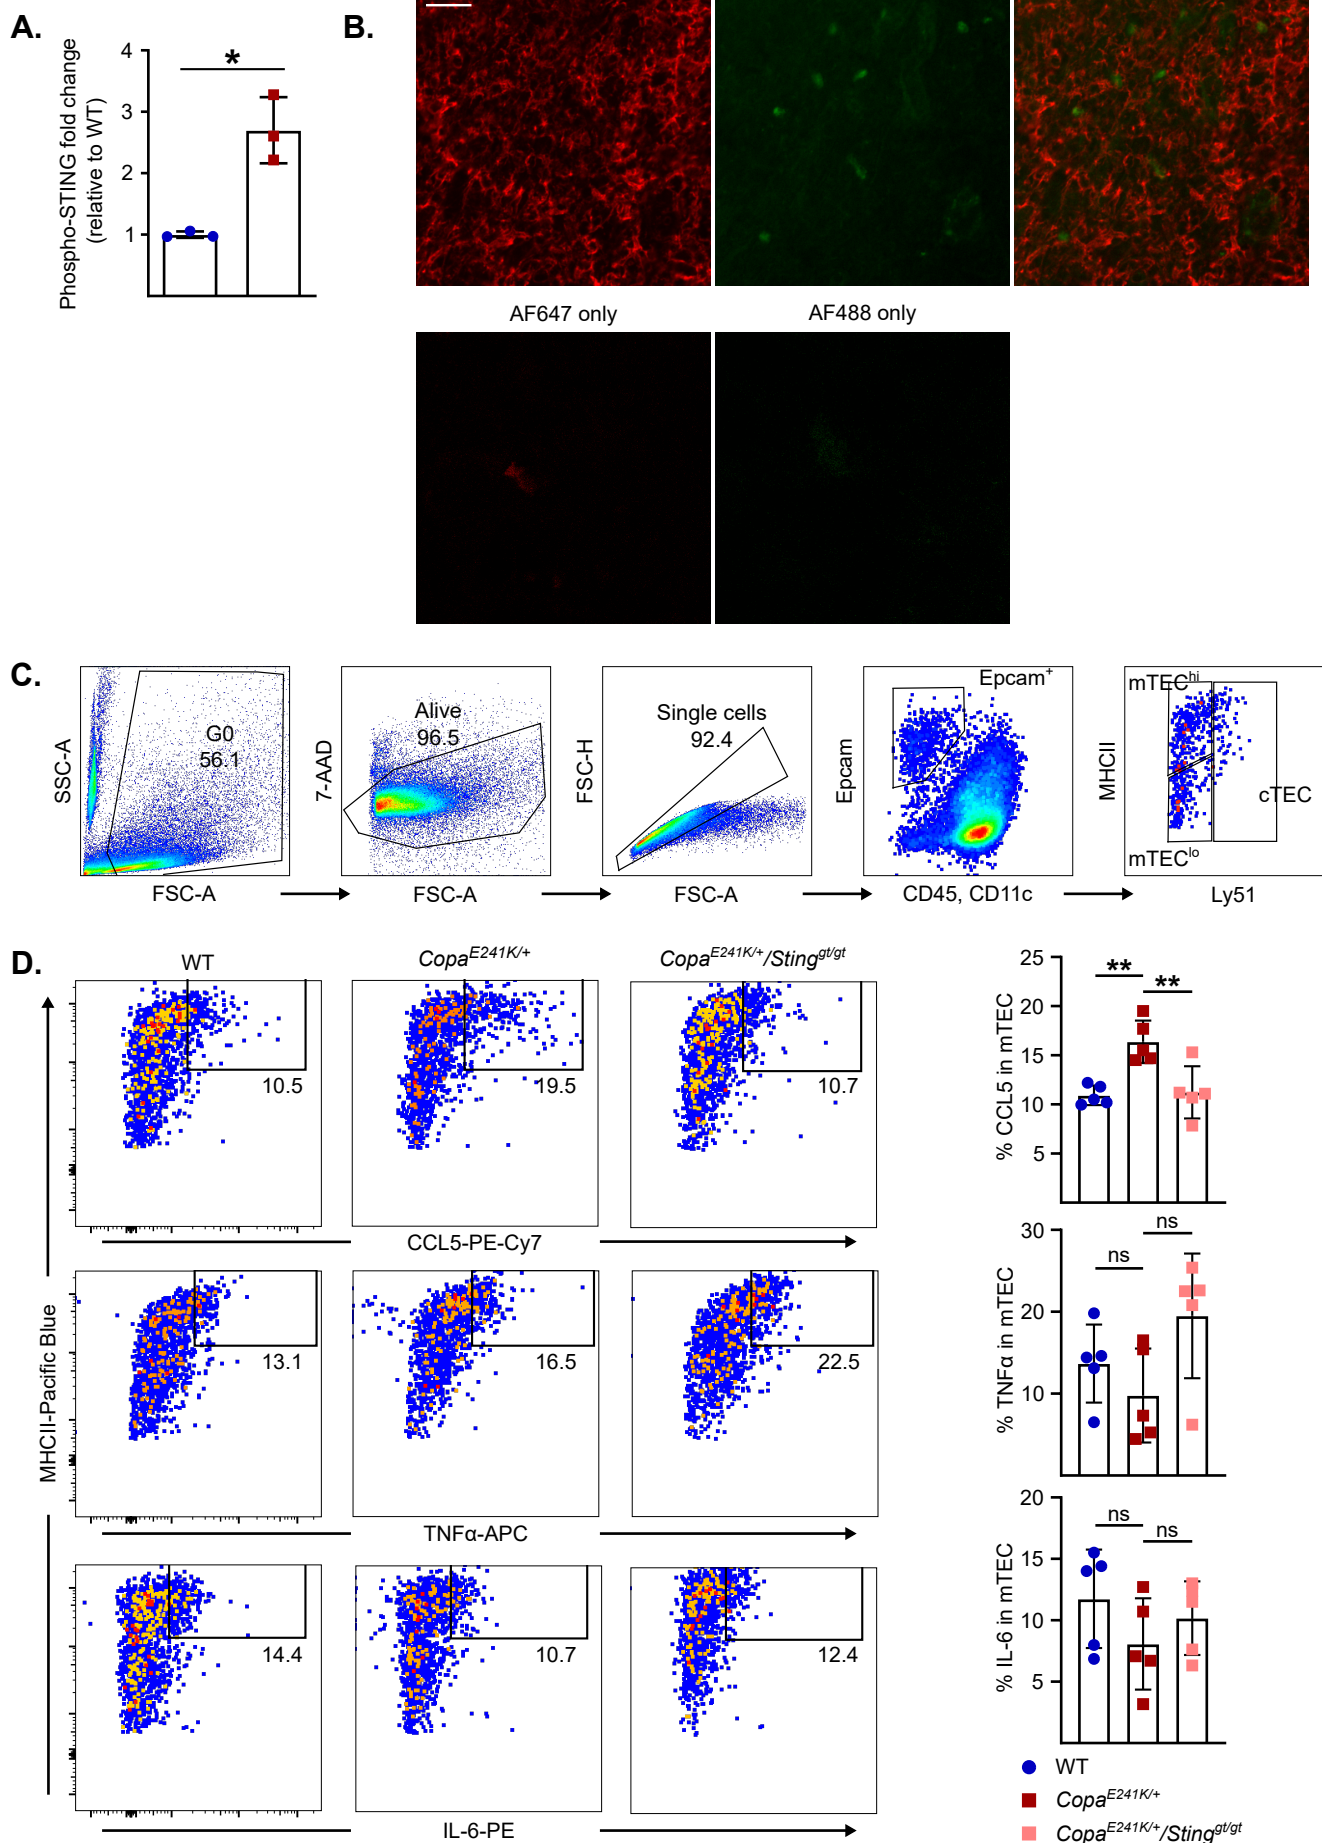

**Supplementary Figure 1.** (A) Quantitation of phosphorylated STING band density in thymic epithelial cells. Data is pooled from 3 independent immunoblots. (B) Representative immunofluorescent staining of keratin 5, pSTING, and secondary antibodies only on wild type thymic section. Image was captured with 40× objective. Scale bar represents 100 μm. (C) Gating strategy for flow cytometry analysis of thymic epithelial cells. (D) Flow cytometry analysis of CCL5, TNFα, and IL-6 in mTECs (WT, n = 5; *Copa*<sup>E241K/+</sup>, n = 5; *Copa*<sup>E241K/+</sup> / *Sting*<sup>gt/gt</sup>, n = 5). Data are pooled from 2 independent experiments and presented as mean ± SD. Unpaired, parametric, two-tailed Student's t-test was used for statistical analysis in (A). One-way ANOVA with Bonferroni's multiple comparisons test was used in (D). *p* < 0.05 is considered statistically significant. ns: not significant.

## Supplementary Figure 2

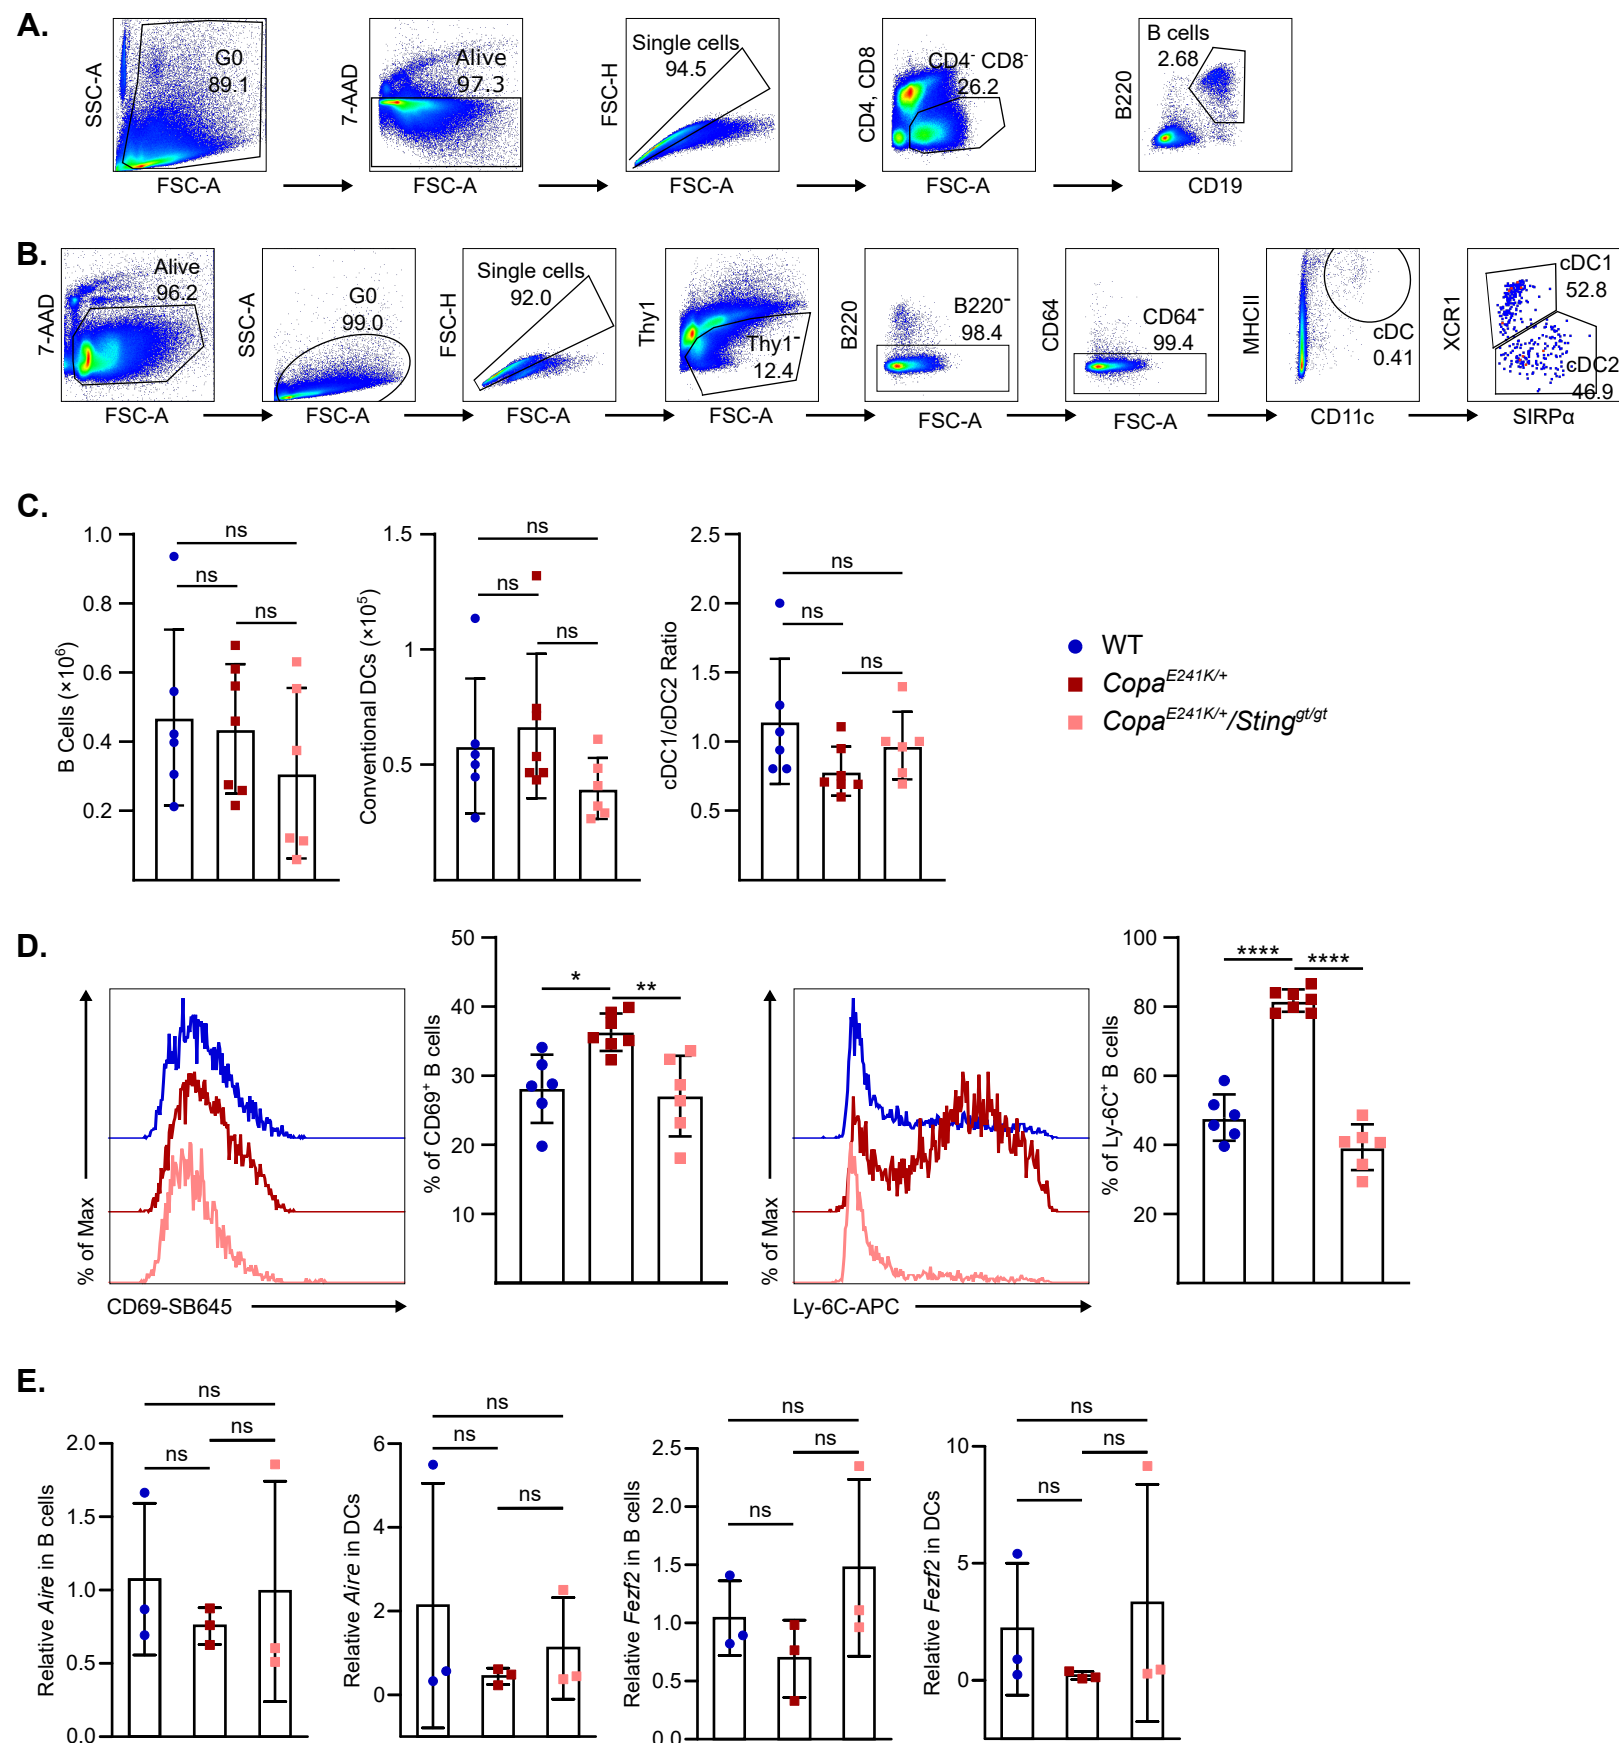

**Supplementary Figure 2.** Gating strategy for flow cytometry analysis of thymic (A) B cells and (B) conventional dendritic cells (cDCs). (C) Left: total count of B cells; middle: total count of cDCs; right: ratio of cDC1/cDC2 (WT,  $n = 6$ ;  $Copa^{E241K/+}$ ,  $n = 7$ ;  $Copa^{E241K/+};Sting^{gt/gt}$ ,  $n = 6$ ). Data are pooled from 2 independent experiments. (D) Left: representative histogram and quantitation of flow cytometry analysis of CD69<sup>+</sup> B cells in the thymus; right: representative histogram and quantitation of thymic Ly-6C<sup>+</sup> B cells (WT  $n = 6$ ,  $Copa^{E241K/+}$   $n = 7$ ,  $Copa^{E241K/+};Sting^{gt/gt}$   $n = 6$ ; data pooled from 2 independent experiments). (E) Quantitative PCR analysis of *Aire* and *Fezf2* transcripts in thymic B and dendritic cells (WT,  $n = 3$ ;  $Copa^{E241K/+}$ ,  $n = 3$ ;  $Copa^{E241K/+};Sting^{gt/gt}$ ,  $n = 3$ ). Data are presented as mean  $\pm$  SD. One-way ANOVA with Bonferroni's multiple comparison test was used for statistical analysis.  $p < 0.05$  is considered statistically significant. ns: not significant.

## Supplementary Figure 3

**A.**

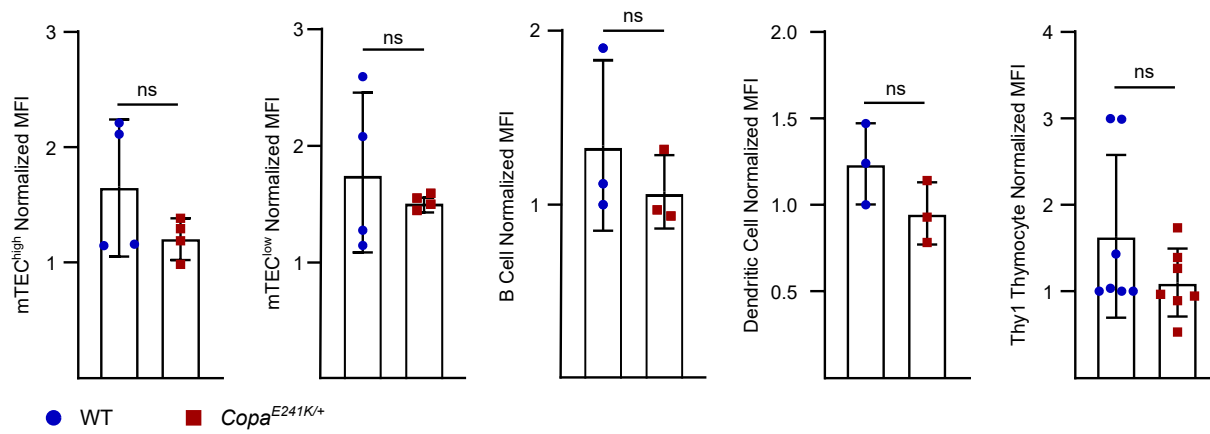

**B.**

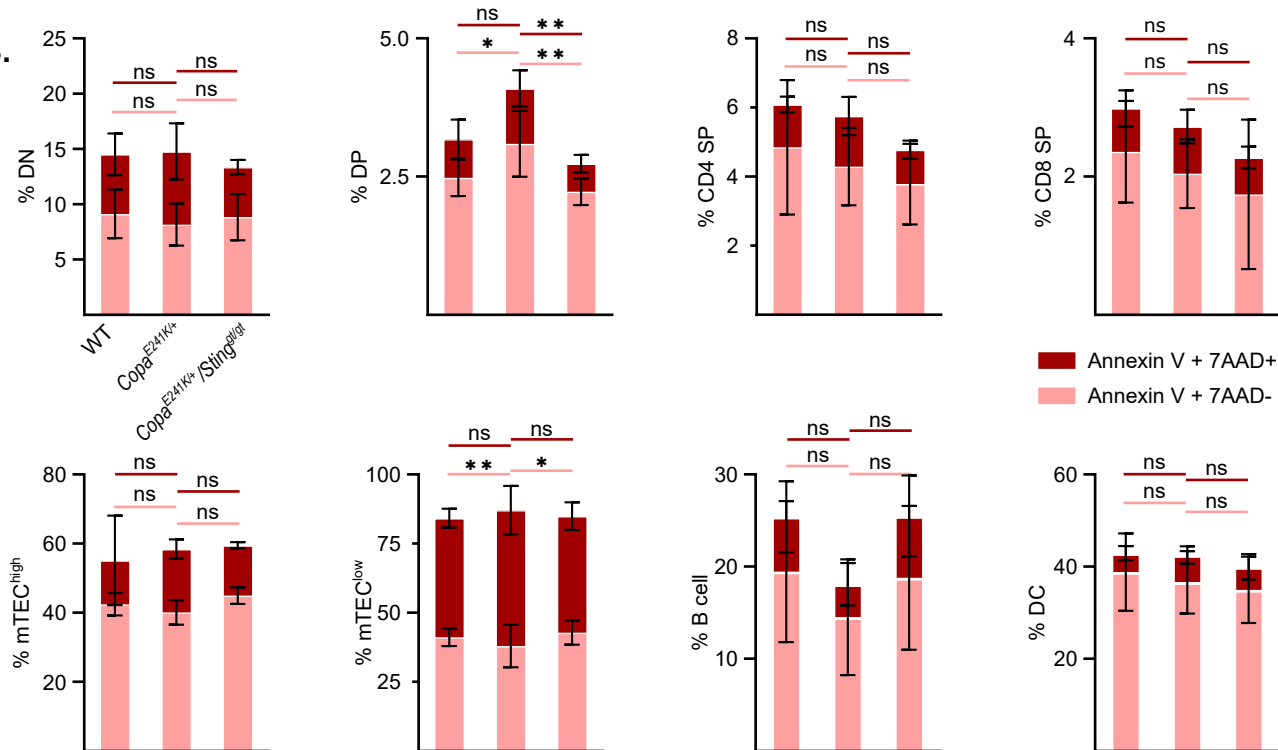

**Supplementary Figure 3. (A)** Normalized MFI of C12FDG staining of thymic populations mTEC<sup>high</sup> (n = 4), mTEC<sup>low</sup> (n = 4), B (n = 3), DC (n = 3), and Thy1 thymocytes (n = 7). **(B)** Quantitation of apoptosis via Annexin V and 7-aminoactinomycin D (7-AAD) staining in thymic populations (WT, n = 7; *Copa*<sup>E241K/+</sup>, n = 8; *Copa*<sup>E241K/+</sup> / *Sting*<sup>glt/glt</sup>, n = 7) double negative, double positive, CD4 single positive, CD8 single positive, mTEC<sup>high</sup> (n = 4 for all), mTEC<sup>low</sup> (n = 4 for all), B (n = 6, 7, 6 respectively), and DC. Data are pooled from two independent experiments and presented as mean ± SD. Unpaired, parametric, two-tailed Student's t-test was used for statistical analysis in (A). One-way ANOVA with Bonferroni's multiple comparison test was used in (B). *p* < 0.05 is considered statistically significant. ns: not significant.

## Supplementary Figure 4

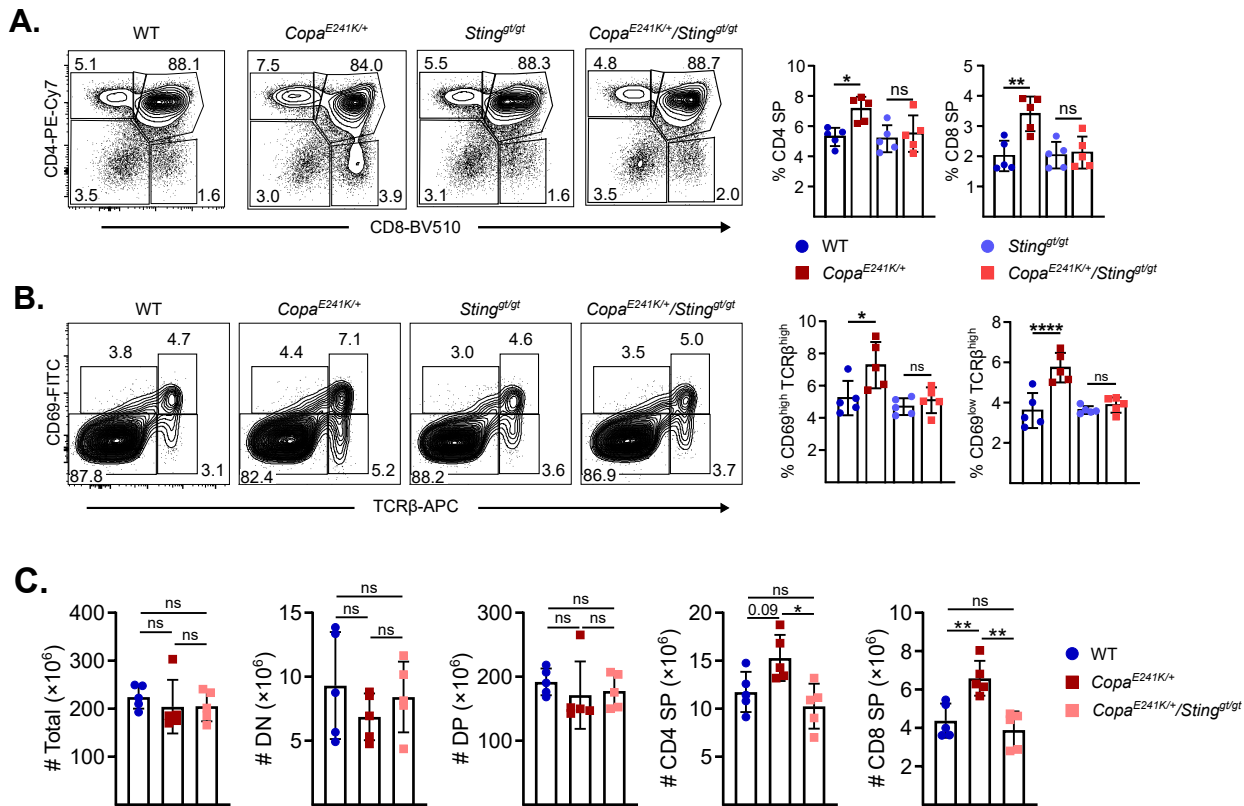

**Supplementary Figure 4.** (A) Left: CD4 and CD8 profile of thymocytes. Right: percentages of single positive CD4 and CD8 thymocytes in indicated mice. (B) Left: thymocyte expression of CD69 and TCR beta chain. Right: percentage of CD69<sup>high</sup> TCRβ<sup>high</sup> and CD69<sup>low</sup> TCRβ<sup>high</sup> thymocytes in indicated mice. (C) Thymocyte counts in indicated mice. Data are pooled from 2 independent experiments (n = 5 for all genotypes) and presented as mean ± SD. One way ANOVA with Bonferroni's multiple comparison test was used for statistical analysis.  $p < 0.05$  is considered statistically significant. ns: not significant.



## Supplementary Figure 5

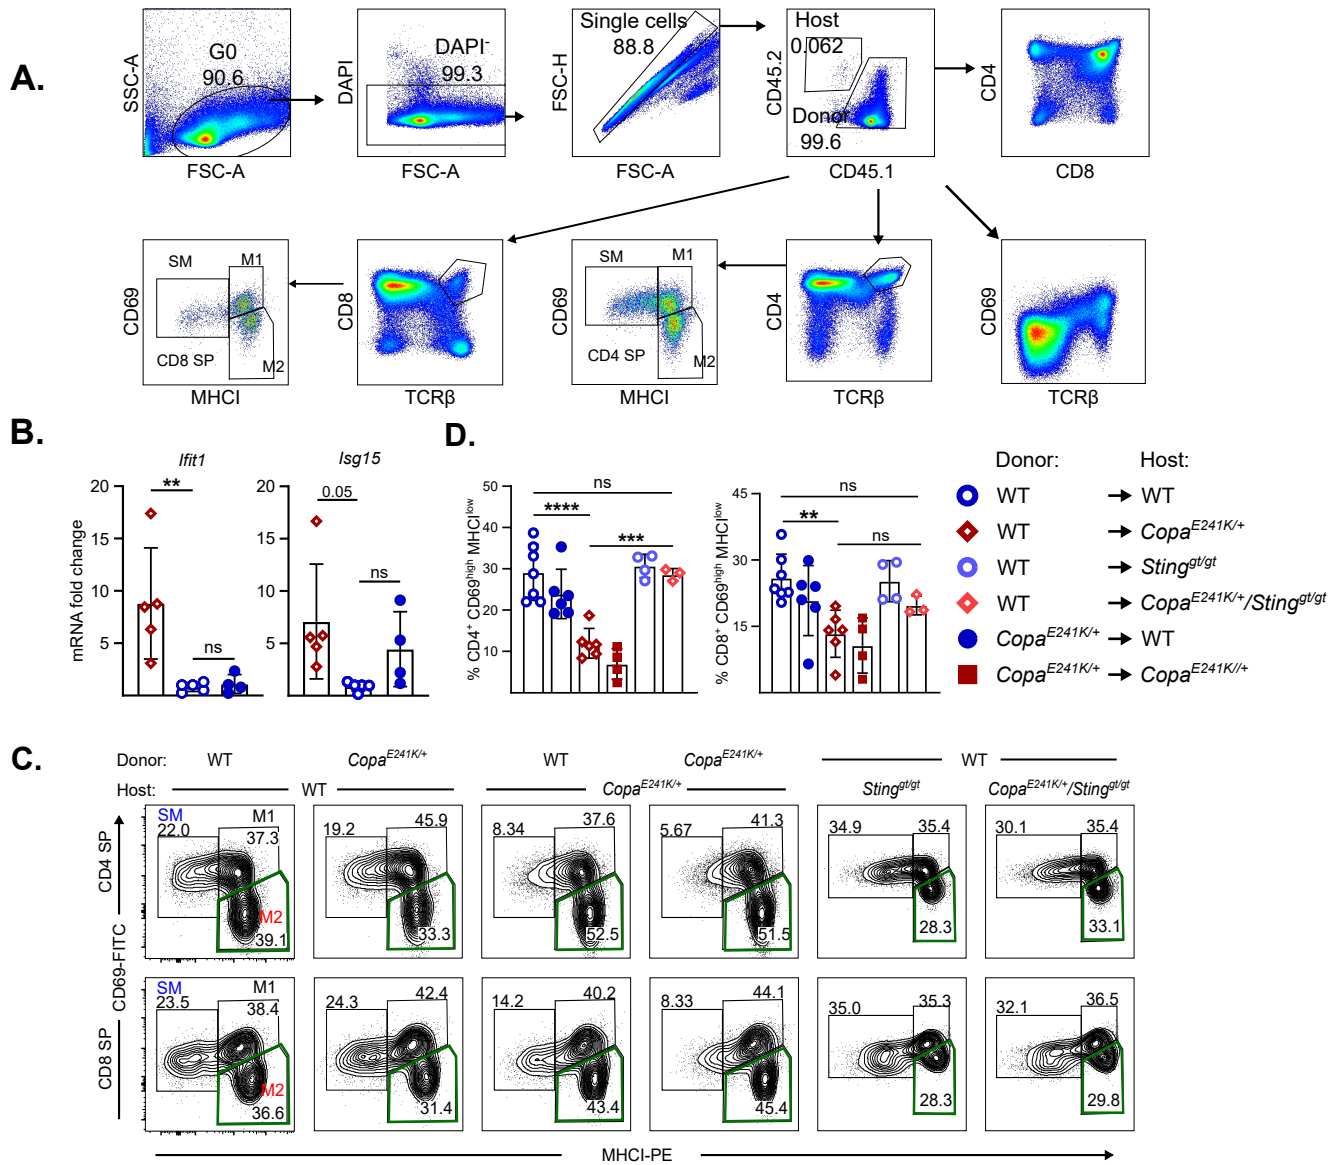

**Supplementary Figure 5.** (A) Gating strategy for CD4 and CD8 single positive thymocytes and subsequent CD69, TCR $\beta$ , and MHC-I profiling in bone marrow chimeras. (B) Relative expression of interferon stimulated genes *Ifit1* and *Isg15* transcript in thymic stroma of indicated chimeras (WT $\rightarrow$  $Copa^{E241K/+}$ , n = 5; WT $\rightarrow$ WT, n = 5;  $Copa^{E241K/+}$  $\rightarrow$ WT, n = 4). (C) Flow analysis of CD69 versus MHC-I on reconstituted single positive thymocytes in bone marrow chimeras indicating SM, M1 and M2 populations in CD4 and CD8 cells. (WT $\rightarrow$ WT, n = 7; WT $\rightarrow$  $Copa^{E241K/+}$ , n = 6;  $Copa^{E241K/+}$  $\rightarrow$ WT, n = 6;  $Copa^{E241K/+}$  $\rightarrow$  $Copa^{E241K/+}$ , n = 4; WT $\rightarrow$  $Sting^{gt/gt}$ , n = 4; WT $\rightarrow$  $Copa^{E241K/+}/Sting^{gt/gt}$ , n = 3). (D) Percentages of CD69<sup>high</sup> MHC-I<sup>low</sup> (semi-mature: SM) cells among the reconstituted CD4 and CD8 single positive thymocytes in BM chimeras. Data are pooled from 2 independent experiments and presented as mean  $\pm$  SD. One way ANOVA with Bonferroni's multiple comparison test was used for statistical analysis.  $p < 0.05$  is considered statistically significant. ns: not significant.

# Supplementary Figure 6

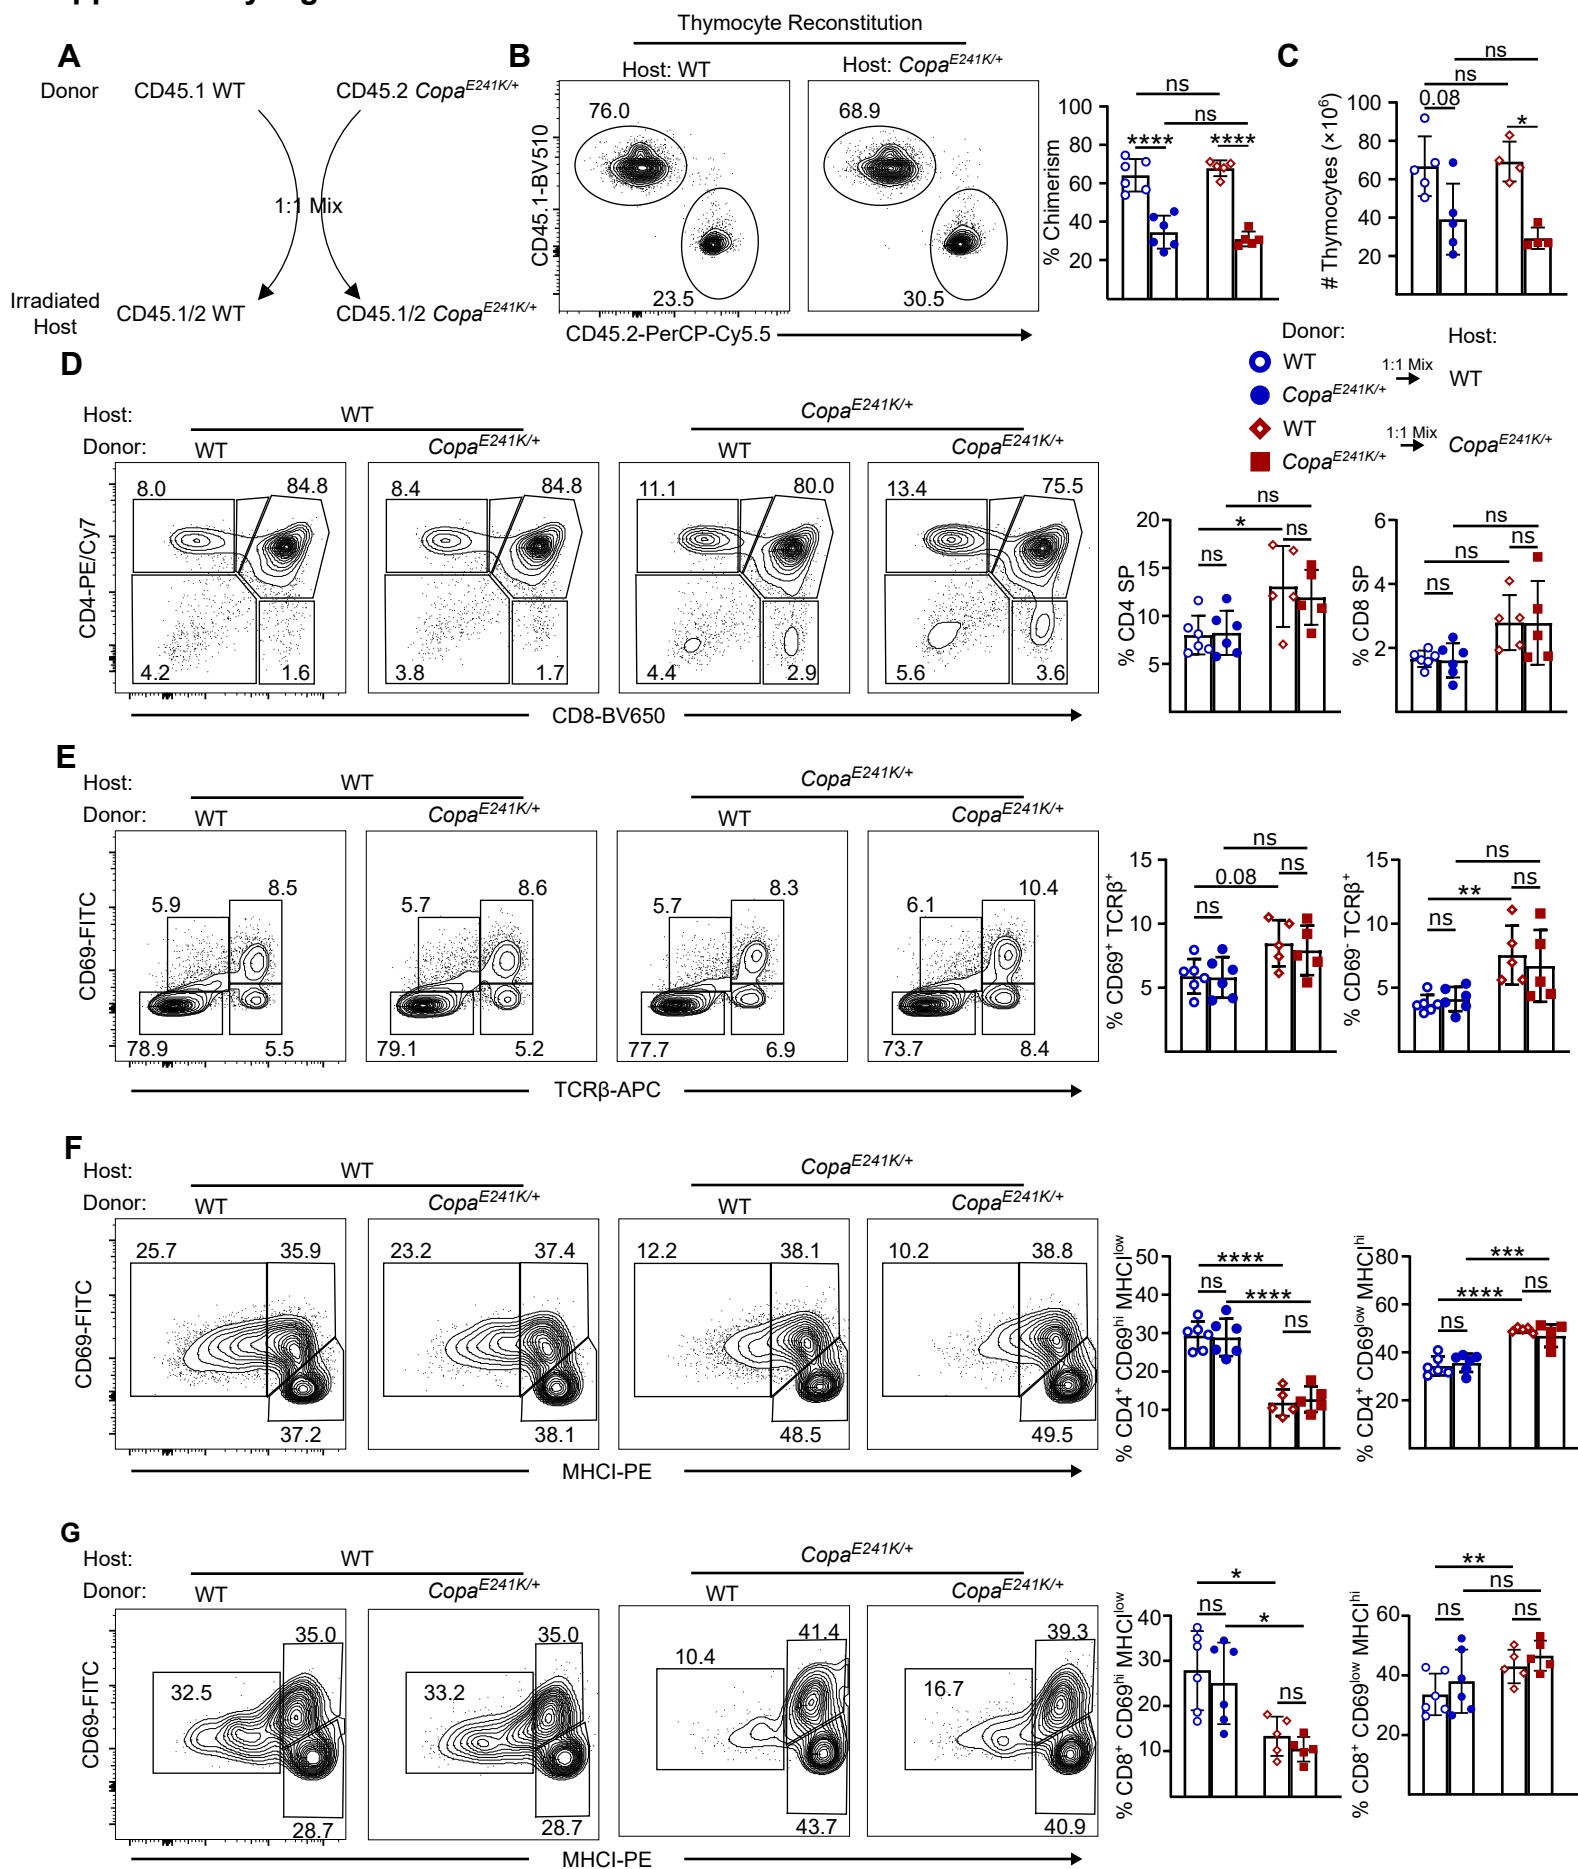

**Supplementary Figure 6.** (A) Schematic for generation of mixed chimeras using congenically marked donors and irradiated hosts (CD45.1 WT + CD45.2 *Copa*<sup>E241K/+</sup> → CD45.1/2 WT n = 6, CD45.1 WT + CD45.2 *Copa*<sup>E241K/+</sup> → CD45.1/2 *Copa*<sup>E241K/+</sup> n = 5). (B) Donor composition of reconstituted thymi in chimeras. Left: representative flow cytometry plot of CD45.1<sup>+</sup> vs CD45.2<sup>+</sup> thymocytes. Right: percentage of chimerism in hosts. (C) Total thymocyte count in reconstituted chimeras. (D) Left: CD4 and CD8 profile of reconstituted thymi. Right: Percentages of CD4 and CD8 single positive thymocytes in chimeras. (E) Characterizing selection of reconstituted thymocytes with CD69 and TCRβ expression. Analysis of thymocyte maturation via CD69 and MHC I in reconstituted (F) CD4 and (G) CD8 single positive cells. Data are pooled from 2 independent experiments and presented as mean ± SD. One-way ANOVA with Bonferroni's multiple comparison test was used for statistical analysis. *p* < 0.05 is considered statistically significant. ns: not significant.

# Supplementary Figure 7

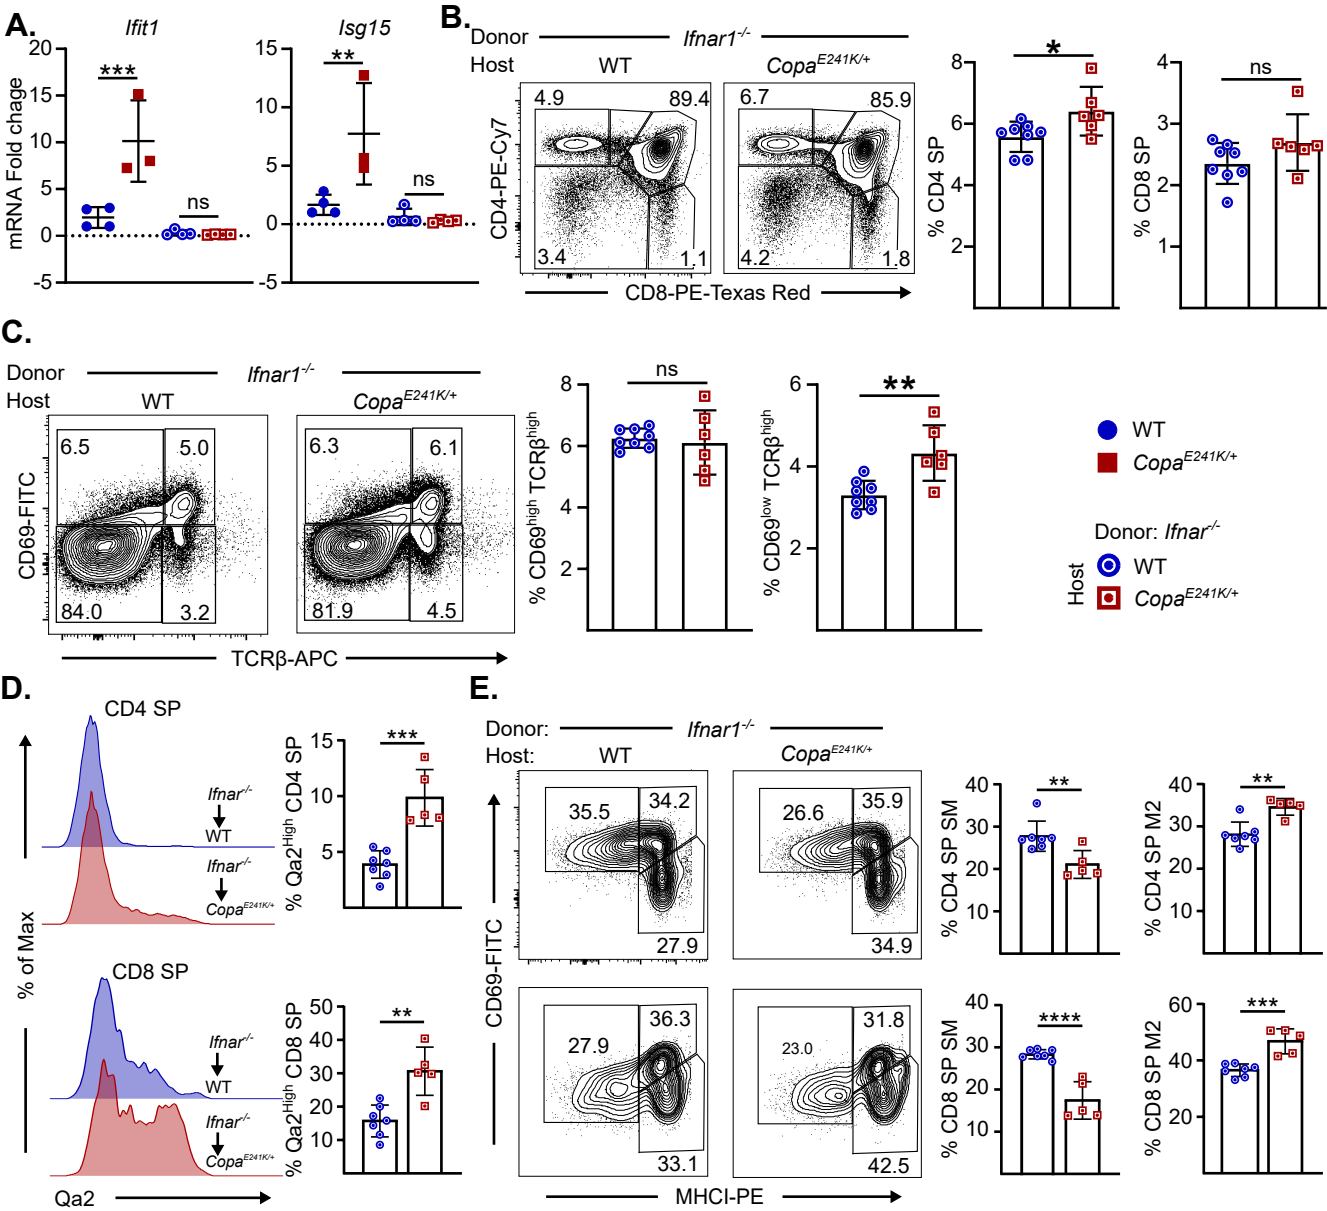

**Supplementary Figure 7.** (A) Relative transcript expression of interferon stimulated genes *Ifit1* and *Isg15* in thymic stroma of indicated mice (WT, n = 4; *Copa*<sup>E241K/+</sup>, n = 4; *Ifnar1*<sup>-/-</sup>→WT, n = 4; *Ifnar1*<sup>-/-</sup>→*Copa*<sup>E241K/+</sup>, n = 4). (B) Left: CD4 and CD8 profile of thymocytes in *Ifnar1*<sup>-/-</sup> chimeras. Right: percentage of single positive CD4 and CD8 thymocytes in indicated chimeras (*Ifnar1*<sup>-/-</sup>→WT, n = 7; *Ifnar1*<sup>-/-</sup>→*Copa*<sup>E241K/+</sup>, n = 5). (C) Left: CD69 and TCR beta chain profiling in reconstituted thymocytes of *Ifnar1*<sup>-/-</sup> chimeras. Right: percentages of CD69<sup>high</sup> TCRβ<sup>high</sup> and CD69<sup>low</sup> TCRβ<sup>high</sup> thymocytes in indicated chimeras (*Ifnar1*<sup>-/-</sup>→WT, n = 7; *Ifnar1*<sup>-/-</sup>→*Copa*<sup>E241K/+</sup>, n = 5). Quantitation of (D) Qa2<sup>high</sup> and (E) SM and M2 single positive thymocyte percentages in *Ifnar1*<sup>-/-</sup> chimeras (*Ifnar1*<sup>-/-</sup>→WT, n = 7; *Ifnar1*<sup>-/-</sup>→*Copa*<sup>E241K/+</sup>, n = 5). Data are from two independent experiments and presented as mean ± SD. One-way ANOVA with Bonferroni's multiple comparison test was used in (A) for statistical analysis. Unpaired, parametric, two-tailed Student's t-test was used in (B), (C), (D), and (E). *p* < 0.05 is considered statistically significant. ns: not significant.

## Supplementary Figure 8

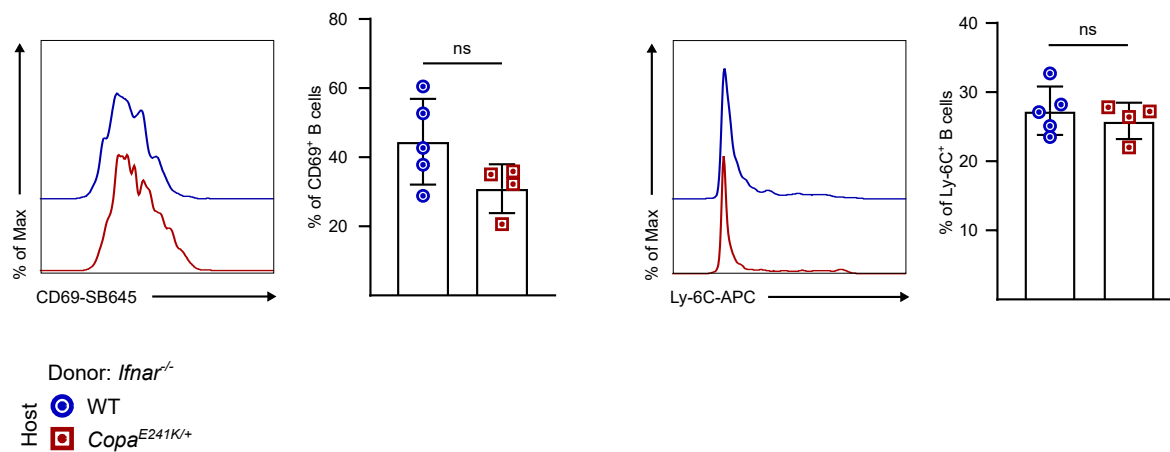

**Supplementary Figure 8.** Left: representative histogram and quantitation from flow cytometry analysis of CD69<sup>+</sup> B cells in the thymus of *Ifnar*<sup>-/-</sup> bone marrow chimeras; right: representative histogram and quantitation of thymic Ly-6C<sup>+</sup> B cells (*Ifnar*<sup>-/-</sup>→WT, n = 5 *Ifnar*<sup>-/-</sup>→*Copa*<sup>E241K/+</sup>, n = 4; data pooled from 2 independent experiments). Data are presented as mean ± SD. Unpaired, parametric, two-tailed Student's t-test was used for statistical analysis.  $p < 0.05$  is considered statistically significant. ns: not significant.

**A.**

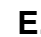

**Supplementary Figure 9.** (A) CD5 expression in Rip-mOVA/Copa/Sting chimeras that received OT-II bone marrow. Left: representative histogram of CD5 expression; and right: CD5 MFI for indicated chimeras (OT-II→WT, n = 11; OT-II→Copa<sup>E241K/+</sup>, n = 5; OT-II→Sting<sup>gt/gt</sup>, n = 9; OT-II→Copa<sup>E241K/+</sup>/Sting<sup>gt/gt</sup>, n = 4). Data are from 2 independent experiments. (B) CD5 expression in single positive thymocytes of WT and Copa<sup>E241K/+</sup> mice. Left: representative histogram of CD5 levels; and right: MFI for indicated mice (WT, n = 9; Copa<sup>E241K/+</sup>, n = 9). Data are from 3 independent experiments. (C) Gating strategy for flow cytometry analysis of thymocytes and TCR Vβ expression. (D) Quantitation of TCR Vβ repertoire of CD4 and CD8 single positive thymocytes. (WT, n = 5; Copa<sup>E241K/+</sup>, n = 4; Copa<sup>E241K/+</sup>/Sting<sup>gt/gt</sup>, n = 5). Data are from 2 independent experiments. (E) Quantitation of TCR Vβ repertoire of double positive and double negative thymocytes (WT, n = 2; Copa<sup>E241K/+</sup>, n = 2; Copa<sup>E241K/+</sup>/Sting<sup>gt/gt</sup>, n = 2). Data presented as mean ± SD. Unpaired, parametric, two-tailed Student's t-test or one-way ANOVA with Bonferroni's multiple comparison test was used for statistical analysis. *p* < 0.05 is considered statistically significant. ns: not significant.



### Supplementary Figure 10

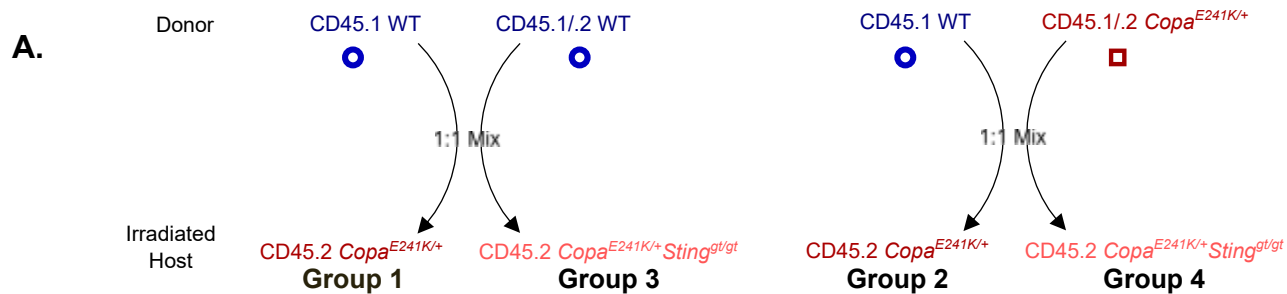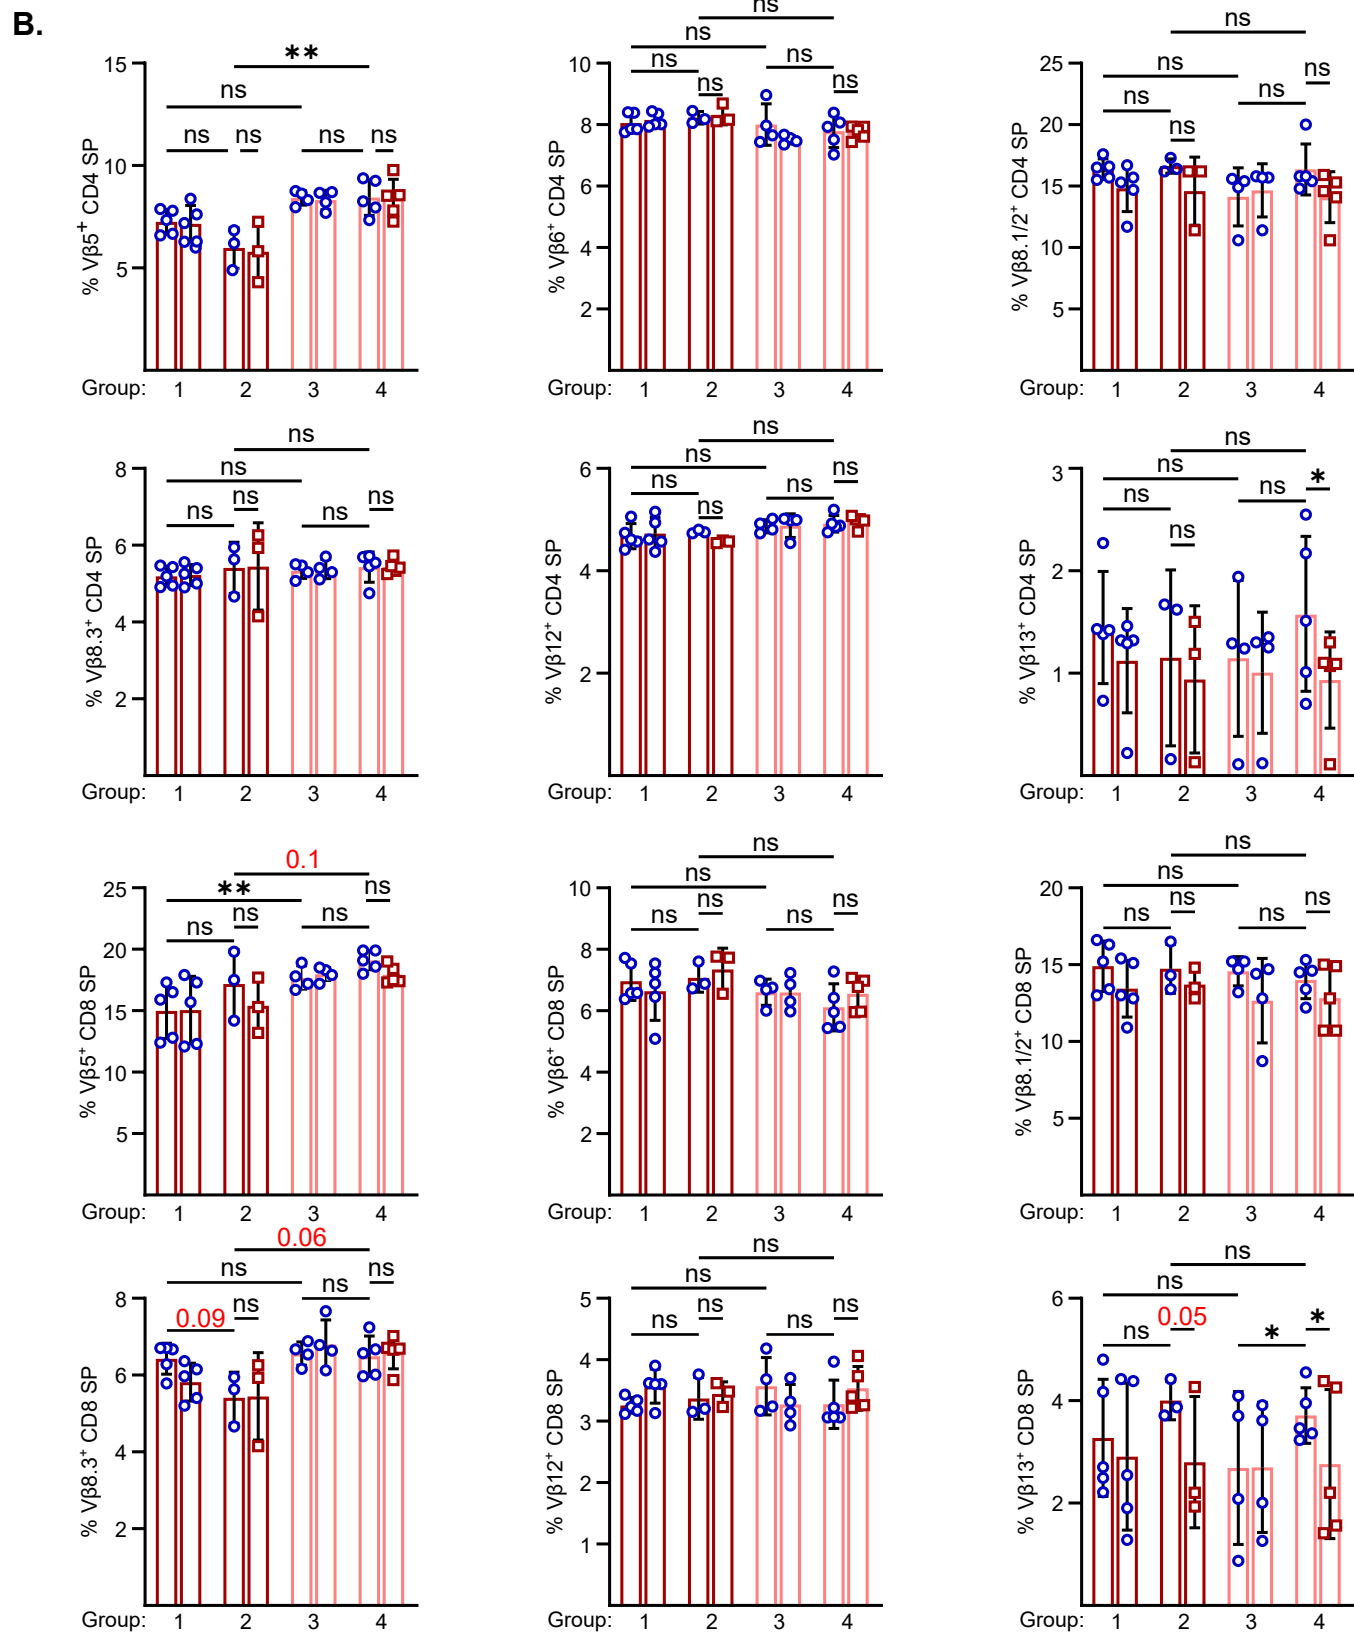

**Supplementary Figure 10.** (A) Schematic for generation of mixed chimeras using congenically marked donors and irradiated hosts (Group 1 n = 5, Group 2 n = 3, Group 3 n = 4, Group 4 n = 5). (B) Resulting TCR V $\beta$  repertoire analysis for reconstituted CD4 and CD8 single positive thymocytes. Data presented as mean  $\pm$  SD. Two-way ANOVA with Šidák's multiple comparisons test was used for statistical analysis.  $p < 0.05$  is considered statistically significant. ns: not significant.

# Supplementary Figure 11

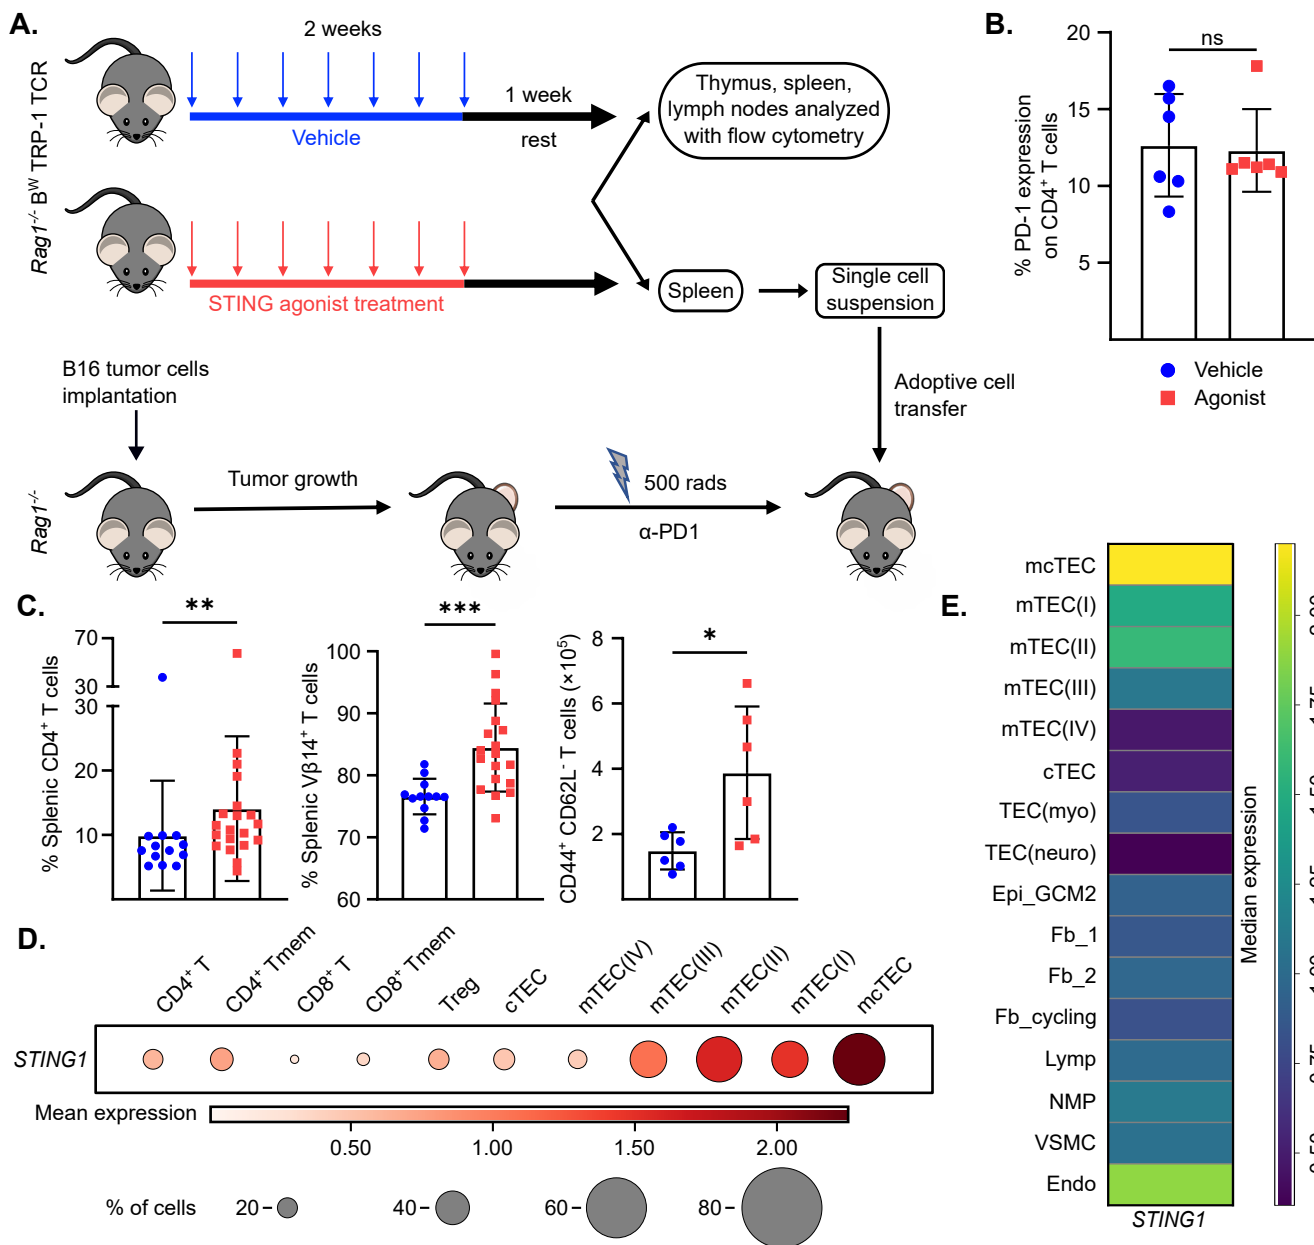

**Supplementary Figure 11.** (A) Schematic for administering vehicle or diABZI STING agonist to *Rag1*<sup>-/-</sup> *Typr1*<sup>B-wt</sup> TCR mice and B16 tumor cell inoculation with adoptive cell transfer into *Rag1*<sup>-/-</sup> mice. (B) Percentage PD-1 expression on peripheral CD4 single positive thymocytes (vehicle n = 6, agonist n = 6; data are pooled from 2 independent experiments). (C) Left: splenic percentage CD4 single positive thymocytes in treated *Rag1*<sup>-/-</sup> *Typr1*<sup>B-wt</sup> TCR mice (vehicle n = 13, agonist n = 20; data are pooled from 3 independent experiments). Middle: percentage of splenic Vβ14<sup>+</sup> CD4 SP thymocytes (vehicle n = 12, agonist n = 19; data are pooled from 3 independent experiments). Right: absolute number of effector memory cells (vehicle n = 6, agonist n = 6; data are from 2 independent experiments). (D) Dot plot for *STING1* mean transcript expression and percent cells expressing transcript, comparing human thymocytes to thymic epithelial cells. (E) Matrix plot of median *STING1* transcript expression in human thymic stromal cells. Unpaired, parametric, two-tailed Student's t-test was used for statistical analysis. *p* < 0.05 is considered statistically significant. ns: not significant.

## Supplementary Figure 12

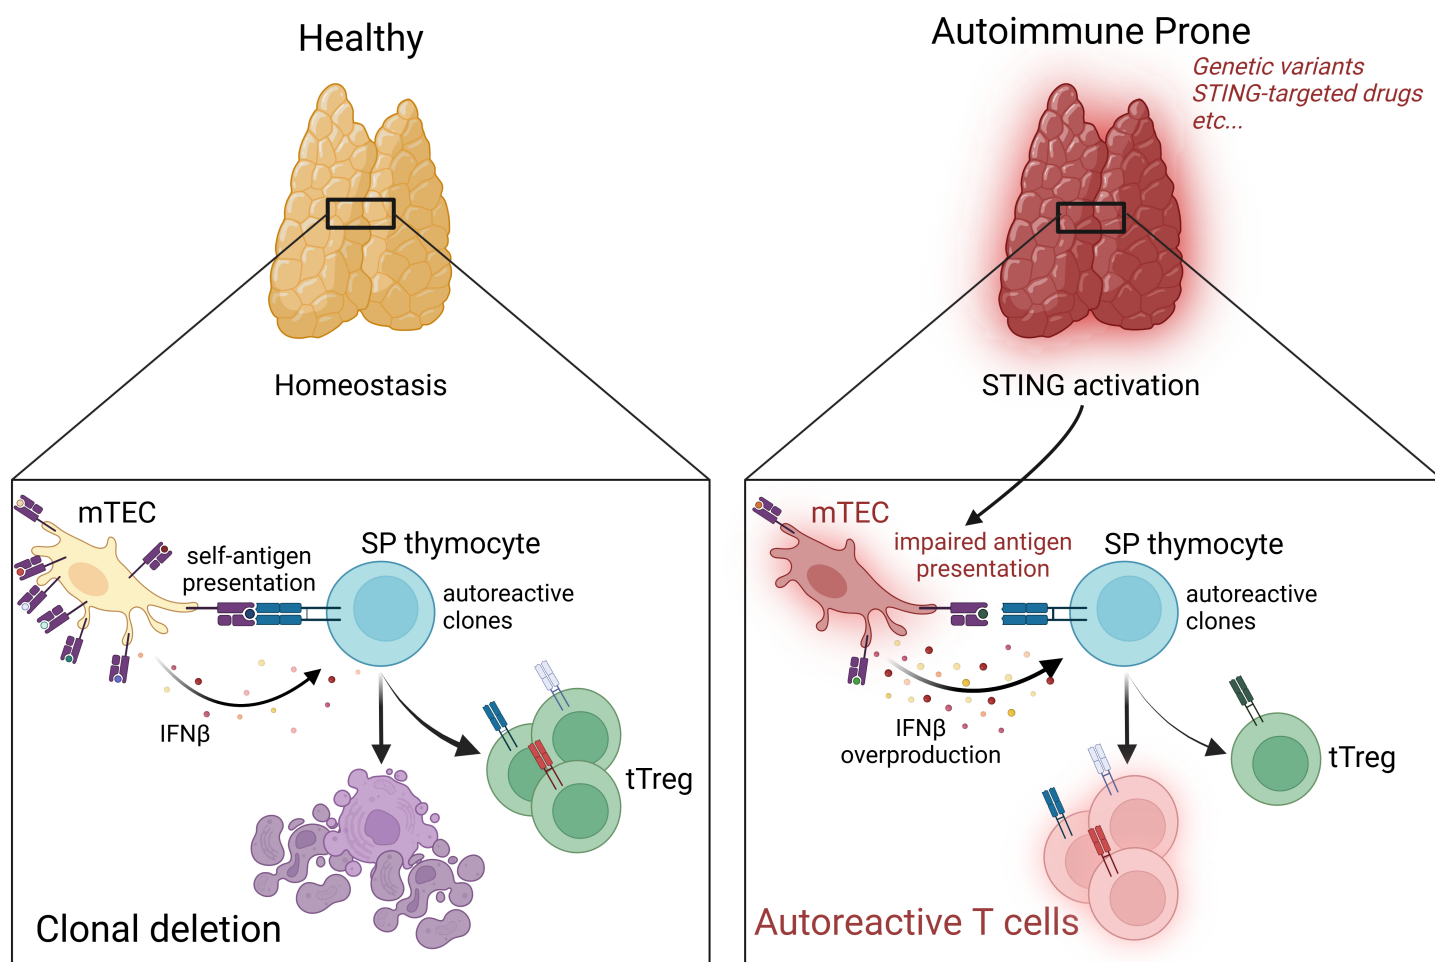

**Supplementary Figure 12.** A graphical summary showing that activation of thymic STING upregulates type I interferon signaling and impairs autophagic flux thereby alters thymocyte maturation and caused both a defect in negative selection and shift in the T cell repertoire.
